# Supplementary material for: Case report: Development of vanishing bile duct syndrome in Stevens-Johnson syndrome complicated by hemophagocytic lymphohistiocytosis
Source: Front Med (Lausanne). 2022 Oct 24;9:975754. doi: 10.3389/fmed.2022.975754 (PMC9637682; doi:10.3389/fmed.2022.975754)
Supplement: Supplementary file 1 [file Data_Sheet_1.pdf]

**Supplementary table 1. Serum viral panel and atypical infection survey results.** IgM: Immunoglobulin M; IgG: Immunoglobulin G; EBV: Epstein-Barr virus; EA: early antigen; EBNA: Epstein-Barr virus nuclear antigen; VCA: viral-capsid antigen; CMV: cytomegalovirus; HSV: herpes simplex virus.

| Hospitalization Day | Mycoplasma Pneumoniae IgM | Mycoplasma Pneumoniae IgG | EBV EA + EBNA1 IgA | EBV EA IgG | EBV VCA IgG Ab | EBV VCA IgM Ab | CMV IgM  | CMV IgG  | HSV IgM  | HSV-1 IgG | HSV-2 IgG |
|---------------------|---------------------------|---------------------------|--------------------|------------|----------------|----------------|----------|----------|----------|-----------|-----------|
| Day 2               | Negative                  | Negative                  |                    | Negative   | Positive       | Negative       | Negative | Positive | Negative | Positive  | Negative  |
| Day 8               | Negative                  | Negative                  |                    |            |                |                | Negative | Positive |          |           |           |
| Day 12              | Negative                  | Negative                  |                    | Negative   | Positive       | Negative       | Negative | Positive | Negative | Positive  | Negative  |
| Day 14              |                           |                           | Negative           |            |                |                |          |          |          |           |           |
| Day 61              |                           |                           |                    | Negative   | Positive       | Negative       |          |          |          |           |           |

**Supplementary figure I. Timeline of Medication Duration and Dosage.** MMF: mycophenolate mofetil; IVIG: intravenous immunoglobulin.

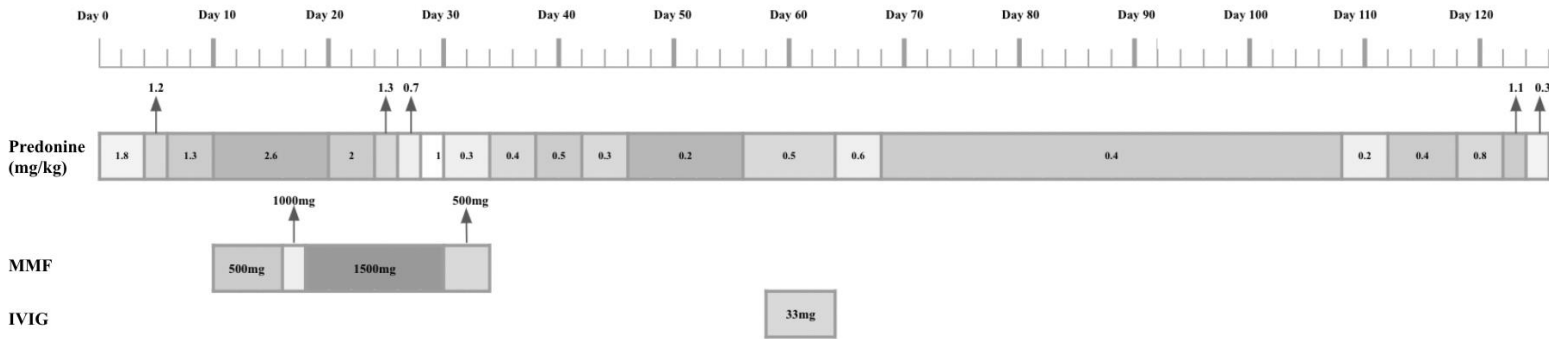

**Supplementary table 2. Serum autoimmune survey results.** ANA: antinuclear antibody; p-ANCA: perinuclear anti-neutrophil cytoplasmic antibody; c-ANCA: cytoplasmic anti-neutrophil cytoplasmic antibody; Anti-ENA: Anti-Extractable nuclear antigen; LKM: liver kidney microsome; EIA: enzyme immunoassay.

[illegible]
